# Supplementary material
Source: PubMed Central journal article supplement (PMC6894505)
Supplement: NIHMS1057457-supplement-Copyright_Assignment.pdf [file NIHMS1057457-supplement-Copyright_Assignment.pdf]

Manuscript #: [ ] (“the Journal”)

Title of the contribution: (“the Contribution”)

Author(s): (“the Authors”)

**To: Nature Publishing Group, a division of Macmillan Publishers Ltd (“NPG”)**

1. In consideration of NPG agreeing to publish the Contribution in the Journal the Authors hereby assign (where relevant by way of present assignment of future rights) to NPG all copyright and other intellectual property or related rights (“Rights”) in the Contribution throughout the world for the full term of protection and all renewals, revivals and extensions.
  - a) They and any academic institution where they work at the time may reproduce the Contribution for the purpose of course teaching
  - b) To reproduce, or to allow a third party publisher to reproduce the Contribution in whole or in part in any printed volume (book or thesis) authored by the Authors subject to NPG’s priorwritten approval to be granted at NPG’s sole discretion; and
  - c) To post a copy of the Contribution as accepted for publication after peer review (in Word or Tex format) on the Authors’ own web site, or the Authors’ institutional repository, or the Authors’ funding body’s archive, six months after publication of the printed or online edition of the Journal, provided that they also link to the Journal article on NPG’s web site (eg through the DOI).
  - d) To reuse figures or tables created by the Authors and contained in the Contribution in oral presentations and other works created by them.
2. Although ownership of all Rights in the Contribution is transferred to NPG, NPG hereby grants to the Authors a licence of the following non-exclusive, non-transferable rights, provided that (i) the rights must not be exercised before first publication of the Contribution in the Journal by the NPG; and (ii) when reproducing or referring to the Contribution or extracts from it the Authors must include an acknowledgement of NPG’s ownership and first publication in the Journal [substantially in the following form: First published in [Journal name, issue number, volume number, year, DOI] □ Nature Publishing Group, a division of Macmillan Publishers Limited]:
  - a) All of the facts contained in the Contribution are true and accurate;
  - b) The Author who has signed this Agreement has full right, power and authority to enter into this Agreement on behalf of all of the Authors;
  - c) Nothing in the Contribution is obscene, defamatory, violates any right of privacy or publicity, infringes any intellectual property rights (including without limitation copyright, database rights or trade mark rights) or any other human, personal or other rights of any person or entity or is otherwise unlawful; and
  - d) Nothing in the Contribution infringes any duty of confidentiality which any of the Authors may owe to anyone else or violates any contract, express or implied, of any of the Authors, and all of the institutions in which work recorded in the Contribution was created have authorised publication of the Contribution.
3. The Authors warrant and represent that:
  - a) The Authors hereby consent to the inclusion of electronic links from the Contribution to third-party material wherever it may be located. The Authors hereby provide their consent and waive their rights provided for in section 80 of the Copyright, Designs and Patents Act 1988 to the extent such consent and waiver is a necessary condition of any exercise of the Rights by NPG.
  - b) This Agreement shall be governed by and construed in accordance with the laws of England without regard to the principles of conflicts of law. The parties hereto submit to the non-exclusive jurisdiction of the English courts.
4. The Authors hereby consent to the inclusion of electronic links from the Contribution to third-party material wherever it may be located. The Authors hereby provide their consent and waive their rights provided for in section 80 of the Copyright, Designs and Patents Act 1988 to the extent such consent and waiver is a necessary condition of any exercise of the Rights by NPG.
5. This Agreement shall be governed by and construed in accordance with the laws of England without regard to the principles of conflicts of law. The parties hereto submit to the non-exclusive jurisdiction of the English courts.

Signed for and on behalf of the Authors:

Date:

Please print name:

Address:
