# Supplementary material
Source: PubMed Central journal article supplement (PMC6894505)
Supplement: NIHMS1057457-supplement-Summary.pdf [file NIHMS1057457-supplement-Summary.pdf]

## Platelet review

### Summary

Experimental evidence suggests that platelets contribute to metastasis through adhesive and hemostatic functions that promote cancer cell survival, immune evasion, and interactions with vascular cells to assist organ colonization from the blood stream.
